# Supplementary material
Source: PubMed Central journal article supplement (PMC3283130)
Supplement: supp_M111.244483_jbc.M111.244483-1.pdf [file supp_M111.244483_jbc.M111.244483-1.pdf]

SUPPLEMENTAL DATA [LUOTO *et al.* (2011)]

Supplementary Table S1  
Primers used for cloning and site-directed mutagenesis of membrane PPases

| Target enzyme | Primer name     | Sequence (5'→3')                              | Restriction site | Purpose                                                                                   |
|---------------|-----------------|-----------------------------------------------|------------------|-------------------------------------------------------------------------------------------|
| Ac-PPase      | Acac_for        | tata <u>catatg</u> actaaaagtcataaaactcaaattc  | NdeI             | Cloning                                                                                   |
|               | Acac_rev2       | tata <u>ctcgag</u> ttataaaattccgccgatact      | XhoI             | Cloning                                                                                   |
| Cl-PPase      | Clim_for        | tata <u>catatg</u> aatacaaacattctctatgc       | NdeI             | Cloning                                                                                   |
|               | Clim_rev        | tata <u>ctcgag</u> ttaaagcagcggagcgcg         | XhoI             | Cloning                                                                                   |
|               | CIE242S_for     | ccgaccttttct <u>ca</u> agctatgtagg            | -                | E242S substitution                                                                        |
|               | CIE242D_for     | ccgaccttttct <u>gata</u> gctatgtagg           | -                | E242D substitution                                                                        |
|               | Cl_rev726       | cgcccatacccgcgaacg                            | -                | Used with CIE242S_for and CIE242D_for                                                     |
|               | CIS180E_for     | tcggcgcag <u>agt</u> ccatcg                   | -                | E180S substitution                                                                        |
|               | CIS180E_rev     | gcgagaagccggagataaggttg                       | -                | Used with CIE180S_for                                                                     |
|               | Cl_for736       | gccgcaatcatcggaac                             | -                | A246G substitution, used with Cl_rev736                                                   |
|               | Cl_rev736       | tacatagctttcgaaaaggctcg                       | -                | A246G substitution, used with Cl_for736                                                   |
|               |                 |                                               |                  |                                                                                           |
| Ctet-PPase    | Ct_for          | tata <u>catatg</u> attcagattactacccaa         | NdeI             | Cloning                                                                                   |
|               | Ct_rev          | tata <u>ctcgag</u> ttagaaaattgagtacataaggaa   | XhoI             | Cloning                                                                                   |
| Da-PPase      | Dace_for        | tata <u>catatg</u> gcataatgttgcgtaatt         | NdeI             | Cloning                                                                                   |
|               | Dace_rev2       | tata <u>ctcgag</u> ttaggctaacacgcggtgc        | XhoI             | Cloning                                                                                   |
| Fj-PPase      | Fla_full        | tata <u>catatg</u> aatgcatttatgattacctg       | NdeI             | Cloning                                                                                   |
|               | Fla_rev         | tata <u>ctcgag</u> ttatttagcggttccactt        | XhoI             | Cloning                                                                                   |
|               | Fjohn_m553_for  | gcttggtgc <u>atcat</u> caattgcttt             | -                | E185S substitution                                                                        |
|               | FjE185D_for     | gcttggtgcag <u>att</u> caattgcttt             | -                | E185D substitution                                                                        |
|               | Fjohn_m553_rev  | gaaaatcccgcgtaaagtttctaaaacaac                | -                | Used with Fjohn_m553_for, FjE185D_for                                                     |
|               | F_john_for739   | gagctgatttattt <u>gaat</u> cgtatgtggc         | -                | G247E substitution                                                                        |
|               | Fjohn_m739_rev  | ccataccggcgaacatcacctac                       | -                | Cloning, used with F_john_for739                                                          |
| Lb-PPase      | Lep_for_full    | tata <u>catatg</u> aatgtagagttaatcattatcgta   | NdeI             | Cloning                                                                                   |
|               | Lep_rev_full    | tata <u>ctcgag</u> ttatttgaagaagtttaaacaattcc | XhoI             | Cloning                                                                                   |
|               |                 |                                               |                  |                                                                                           |
|               | Lep_full_midfor | ccattgat <u>gcg</u> tatggtc                   | -                | Elimination of internal NdeI site                                                         |
|               | Lep_full_midrev | gaccatacgcatcaatgg                            | -                | Elimination of internal NdeI site                                                         |
|               | LbE253D_for     | ttctgctgcg <u>gat</u> gccacttgt               | -                | E253D substitution                                                                        |
|               | LbE253D_rev     | ccaaaaaggtcagcacccataccc                      | -                | Cloning, used with LbE253D_for                                                            |
|               | LbE253S_for     | ttctgctgcg <u>tcag</u> ccacttgt               | -                | E253S substitution                                                                        |
|               | Lb253rev        | ccaaaaaggtcagcacccatacc                       | -                | Used with LbE253S_for                                                                     |
|               | Lbif_m745_for   | gaagccacttgtgcggcc                            | -                | Used with Lbif_m745_rev                                                                   |
|               | Lbif_m745_rev   | cgcagcag <u>att</u> caaaaaggtcagc             | -                | G249E substitution                                                                        |
|               | Lbif_m757_for   | <u>at</u> tctgctgcg <u>ggc</u> gccacttgt      | -                | E253G substitution, used with Lb253rev. G249E/E253G substitution, used with Lbif_m757_rev |
|               |                 |                                               |                  |                                                                                           |
|               | Lbif_m757_rev   | <u>t</u> caaaaaggtcagcacccataccc              | -                | Used with Lbif_m757_for, part of the G249E                                                |

|                                                                                                                                            |          |                                                    |         |              |
|--------------------------------------------------------------------------------------------------------------------------------------------|----------|----------------------------------------------------|---------|--------------|
|                                                                                                                                            |          |                                                    |         | substitution |
| Pa-PPase                                                                                                                                   | Ppa_for  | tata <u><i>catat</i></u> gataagctatgccttactagg     | NdeI    | Cloning      |
|                                                                                                                                            | Ppa_rev  | tata <u><i>aagctt</i></u> tttagaaaggcaatagacctgacg | HindIII | Cloning      |
| Sc-PPase                                                                                                                                   | Scop_for | ttt <u><i>catat</i></u> ggcgggagcttctacc           | NdeI    | Cloning      |
|                                                                                                                                            | Scop_rev | ttt <u><i>aagctt</i></u> ctacgaaaccacggccg         | HindIII | Cloning      |
| Restriction enzyme recognition sites and nucleotide substitutions are underlined and italicized within the primer sequences, respectively. |          |                                                    |         |              |

Supplementary Figure S1.

**Western blots of recombinant membrane PPases in *E. coli* IMV.** IMV proteins (3–40 mg/ml) were denatured by incubating for 15 min with an equal volume of SDS loading buffer (139 mM Tris-HCl, pH 6.8, 22% glycerol, 4% SDS, 5 mM DTT and 0.5 mg/ml bromophenol blue) at 50°C, and separated (0.2–2 µg protein) on pre-cast mini SDS-PAGE gels (4–20% acrylamide gradient, Idgel). The electrophoresed samples were transferred to a nitrocellulose membrane (Whatman) in standard Towbin buffer (53) containing 20% (v/v) methanol for 1 h at 100 V in a Mini Trans-Blot apparatus (Bio-Rad). Membrane PPase bands were visualized by Western analysis using rabbit antiserum raised against conserved amino acid motifs in the third cytoplasmic loop of the enzyme (19).

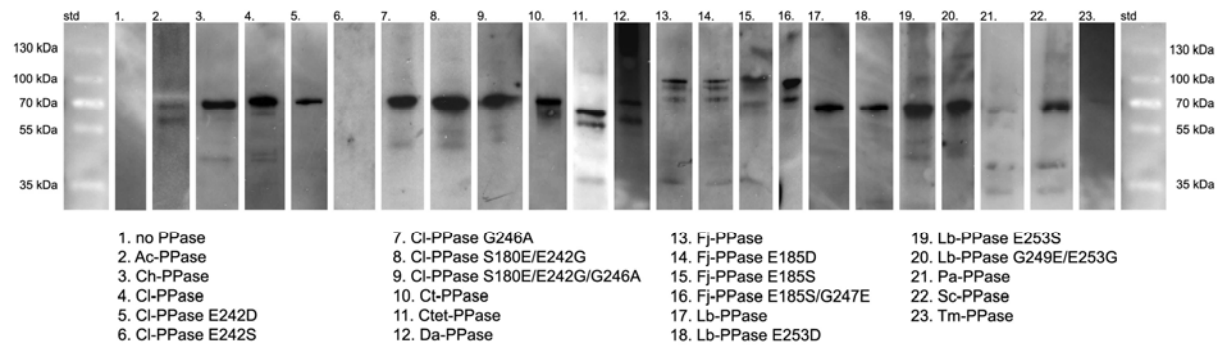

#### REFERENCES FOR SUPPLEMENTAL DATA

19. Malinen, A. M., Belogurov, G. A., Baykov, A. A., and Lahti, R. (2007) *Biochemistry* **46**, 8872-8878
53. Towbin, H., Staehelin, T., and Gordon, J. (1979) *Proc Natl Acad Sci U S A* **76**, 4350-4354
